# Supplementary material for: Regionalization of intestinal microbiota and metabolites in the small intestine of the Bactrian camel
Source: Front Immunol. 2024 Nov 26;15:1464664. doi: 10.3389/fimmu.2024.1464664 (PMC11628504; doi:10.3389/fimmu.2024.1464664)
Supplement: Supplementary file 5 [file Table4.xlsx]

## Sheet: D-PPs vs J-PPs
Pathway	P vaule	-ln(p)	FDR	Impact	Hits Cpd	Total Cdp
Histidine metabolism	0.0019949	6.2172	0.13055	0.59712	L-Histidine cpd:C00135; Methylimidazole acetaldehyde cpd:C05827; Histamine cpd:C00388; Formiminoglutamic acid cpd:C00439	4-Imidazolone-5-propionic acid cpd:C03680; Urocanic acid cpd:C00785; L-Histidine cpd:C00135; Imidazole-4-acetaldehyde cpd:C05130; 1-Methylhistamine cpd:C05127; Methylimidazole acetaldehyde cpd:C05827; Histamine cpd:C00388; Carnosine cpd:C00386; N-Formyl-L-aspartate cpd:C01044; Formiminoglutamic acid cpd:C00439; Imidazoleacetic acid cpd:C02835; Methylimidazoleacetic acid cpd:C05828; L-Aspartic aci…
Nitrogen metabolism	0.0048351	5.3318	0.13055	0	L-Glutamic acid cpd:C00025; L-Cystathionine cpd:C02291; L-Histidine cpd:C00135	Ammonia cpd:C00014; Carbon dioxide cpd:C00011; L-Glutamic acid cpd:C00025; L-Glutamine cpd:C00064; L-Cystathionine cpd:C02291; L-Histidine cpd:C00135; Carbamoylphosphate cpd:C00169; Carbonic acid cpd:C01353; Glycine cpd:C00037
Phenylalanine metabolism	0.0048351	5.3318	0.13055	0.40741	L-Phenylalanine cpd:C00079; 2-Phenylacetamide cpd:C02505; L-Tyrosine cpd:C00082	Phenylacetaldehyde cpd:C00601; L-Phenylalanine cpd:C00079; Phenylethylamine cpd:C05332; Phenylpyruvic acid cpd:C00166; Phenylacetic acid cpd:C07086; Ortho-Hydroxyphenylacetic acid cpd:C05852; Enol-phenylpyruvate cpd:C02763; 2-Phenylacetamide cpd:C02505; L-Tyrosine cpd:C00082
Phenylalanine, tyrosine and tryptophan biosynthesis	0.0097159	4.634	0.19675	1	L-Phenylalanine cpd:C00079; L-Tyrosine cpd:C00082	Phenylpyruvic acid cpd:C00166; L-Phenylalanine cpd:C00079; L-Tyrosine cpd:C00082; 4-Hydroxyphenylpyruvic acid cpd:C01179
Aminoacyl-tRNA biosynthesis	0.014626	4.2249	0.23694	0.14035	L-Histidine cpd:C00135; L-Phenylalanine cpd:C00079; L-Arginine cpd:C00062; L-Serine cpd:C00065; L-Valine cpd:C00183; L-Tyrosine cpd:C00082; L-Proline cpd:C00148	L-Asparagine cpd:C00152; tRNA(Asn) cpd:C01637; L-Histidine cpd:C00135; tRNA(His) cpd:C01643; L-Phenylalanine cpd:C00079; tRNA(Phe) cpd:C01648; L-Arginine cpd:C00062; tRNA(Arg) cpd:C01636; L-Glutamine cpd:C00064; tRNA(Gln) cpd:C01640; L-Cysteine cpd:C00097; tRNA(Cys) cpd:C01639; Glycine cpd:C00037; tRNA(Gly) cpd:C01642; tRNA(Asp) cpd:C01638; L-Aspartic acid cpd:C00049; L-Serine cpd:C00065; tRNA(Se…
Glycerophospholipid metabolism	0.029654	3.5181	0.37313	0.07224	Phosphorylcholine cpd:C00588; Choline cpd:C00114; Acetylcholine cpd:C01996; O-Phosphoethanolamine cpd:C00346	Phosphatidylethanolamine cpd:C00350; Phosphatidylcholine cpd:C00157; Dihydroxyacetone phosphate cpd:C00111; LysoPC(18:1(9Z)) cpd:C04230; 1,2-Diacyl-sn-glycerol cpd:C00641; Citicoline cpd:C00307; Phosphorylcholine cpd:C00588; Choline cpd:C00114; Acetylcholine cpd:C01996; O-Phosphoethanolamine cpd:C00346; Ethanolamine cpd:C00189; PA(16:0/16:0) cpd:C00416; Acyl-CoA cpd:C00040; 1-Acyl-sn-glycerol 3-p…
Arginine and proline metabolism	0.033014	3.4108	0.37313	0.28673	Argininosuccinic acid cpd:C03406; L-Arginine cpd:C00062; L-Glutamic acid cpd:C00025; L-Proline cpd:C00148; Creatine cpd:C00300	L-Glutamine cpd:C00064; Ammonia cpd:C00014; Carbamoylphosphate cpd:C00169; Ornithine cpd:C00077; Citrulline cpd:C00327; L-Aspartic acid cpd:C00049; Argininosuccinic acid cpd:C03406; L-Arginine cpd:C00062; L-Glutamic acid cpd:C00025; N-Acetylornithine cpd:C00437; L-Proline cpd:C00148; Peptide cpd:C00012; D-Proline cpd:C00763; Hydroxyproline cpd:C01157; Pyrroline hydroxycarboxylic acid cpd:C04281; …
Glycine, serine and threonine metabolism	0.040925	3.196	0.37313	0.2428	L-Serine cpd:C00065; Choline cpd:C00114; L-Cystathionine cpd:C02291; Creatine cpd:C00300	L-Serine cpd:C00065; Choline cpd:C00114; Glyceric acid cpd:C00258; Betaine cpd:C00719; Guanidoacetic acid cpd:C00581; 3-Phospho-D-glycerate cpd:C00197; Dimethylglycine cpd:C01026; L-Cystathionine cpd:C02291; Glycine cpd:C00037; Phosphoserine cpd:C01005; Sarcosine cpd:C00213; 5,10-Methylene-THF cpd:C00143; L-Threonine cpd:C00188; Lipoylprotein cpd:C02051; Aminoacetone cpd:C01888; Tetrahydrofolic a…
Pentose phosphate pathway	0.041459	3.183	0.37313	0.17117	Glucose 6-phosphate cpd:C00668; D-Ribulose 5-phosphate cpd:C00199; Gluconolactone cpd:C00198	Glucose 6-phosphate cpd:C00668; Deoxyribose cpd:C01801; Deoxyribose 5-phosphate cpd:C00673; D-Ribulose 5-phosphate cpd:C00117; D-Ribose cpd:C00121; Sedoheptulose 7-phosphate cpd:C05382; D-Glyceraldehyde 3-phosphate cpd:C00118; D-Ribulose 5-phosphate cpd:C00199; Beta-D-Fructose 6-phosphate cpd:C05345; beta-D-Fructose 1,6-bisphosphate cpd:C05378; 6-Phosphogluconic acid cpd:C00345; 6-Phosphonoglucon…
Sphingolipid metabolism	0.053661	2.9251	0.43465	0.01504	L-Serine cpd:C00065; Phytosphingosine cpd:C12144; O-Phosphoethanolamine cpd:C00346	Sphinganine cpd:C00836; Sphinganine 1-phosphate cpd:C01120; Dihydroceramide cpd:C12126; Phytoceramide cpd:C12145; SM cpd:C00550; Ceramide 1-phosphate cpd:C02960; Sphingosine 1-phosphate cpd:C06124; Palmityl-CoA cpd:C00154; L-Serine cpd:C00065; 3-Dehydrosphinganine cpd:C02934; Galabiosylceramide cpd:C06126; Galactosylceramide cpd:C02686; GM4 cpd:C06128; Ceramide cpd:C00195; Lactosylceramide cpd:C0…
Ubiquinone and other terpenoid-quinone biosynthesis	0.12003	2.12	0.88385	0	L-Tyrosine cpd:C00082	4-Hydroxyphenylpyruvic acid cpd:C01179; L-Tyrosine cpd:C00082; Homogentisic acid cpd:C00544
Linoleic acid metabolism	0.19206	1.6499	1	0	13-L-Hydroperoxylinoleic acid cpd:C04717	Linoleic acid cpd:C01595; Phosphatidylcholine cpd:C00157; 9,10-Epoxyoctadecenoic acid cpd:C14825; 12,13-EpOME cpd:C14826; 13-L-Hydroperoxylinoleic acid cpd:C04717
D-Glutamine and D-glutamate metabolism	0.19206	1.6499	1	1	L-Glutamic acid cpd:C00025	L-Glutamic acid cpd:C00025; D-Glutamine cpd:C00819; L-Glutamine cpd:C00064; Oxoglutaric acid cpd:C00026; D-Glutamic acid cpd:C00217
Cyanoamino acid metabolism	0.22587	1.4878	1	0	L-Serine cpd:C00065	3-Cyano-L-alanine cpd:C02512; Beta-Aminopropionitrile cpd:C05670; Glycine cpd:C00037; gamma-Glutamyl-beta-cyanoalanine cpd:C05711; gamma-Glutamyl-beta-aminopropiononitrile cpd:C06114; L-Serine cpd:C00065
Alanine, aspartate and glutamate metabolism	0.24852	1.3922	1	0.29333	Argininosuccinic acid cpd:C03406; L-Glutamic acid cpd:C00025	N-Acetyl-L-aspartic acid cpd:C01042; 2-Oxosuccinamate cpd:C02362; L-Aspartic acid cpd:C00049; D-Aspartic acid cpd:C00402; Argininosuccinic acid cpd:C03406; Adenylsuccinic acid cpd:C03794; L-Alanine cpd:C00041; Succinic acid semialdehyde cpd:C00232; L-Glutamic acid cpd:C00025; Gamma-Aminobutyric acid cpd:C00334; L-Glutamine cpd:C00064; Ammonia cpd:C00014; 2-Keto-glutaramic acid cpd:C00940; (S)-1-P…
Methane metabolism	0.31917	1.142	1	0.4	L-Serine cpd:C00065	S-Formylglutathione cpd:C01031; Glycine cpd:C00037; 5,10-Methylene-THF cpd:C00143; S-(Hydroxymethyl)glutathione cpd:C14180; Methanol cpd:C00132; Formic acid cpd:C00058; L-Serine cpd:C00065; Formaldehyde cpd:C00067; 5-Methyltetrahydrofolic acid cpd:C00440
Cysteine and methionine metabolism	0.32733	1.1168	1	0.18927	L-Cystathionine cpd:C02291; L-Serine cpd:C00065	2-Oxo-4-methylthiobutanoic acid cpd:C01180; 1,2-Dihydroxy-3-keto-5-methylthiopentene cpd:C15606; 5-Methylthioribulose 1-phosphate cpd:C04582; 5'-Methylthioadenosine cpd:C00170; S-Adenosylmethioninamine cpd:C01137; S-Adenosylmethionine cpd:C00019; L-Cystathionine cpd:C02291; L-Homocysteine cpd:C00155; L-Serine cpd:C00065; L-Methionine cpd:C00073; S-Adenosylhomocysteine cpd:C00021; 2,3-Diketo-5-met…
Valine, leucine and isoleucine biosynthesis	0.37514	0.98045	1	0.33333	L-Valine cpd:C00183	3-Methyl-2-oxovaleric acid cpd:C00671; L-Leucine cpd:C00123; L-Valine cpd:C00183; Alpha-ketoisovaleric acid cpd:C00141; L-Isoleucine cpd:C00407; Pyruvic acid cpd:C00022; L-Leucyl-tRNA cpd:C02047; 4-Methyl-2-oxopentanoate cpd:C00233; L-Valyl-tRNA(Val) cpd:C02554; L-Isoleucyl-tRNA(Ile) cpd:C03127; 2-(a-Hydroxyethyl)thiamine diphosphate cpd:C05125
Pentose and glucuronate interconversions	0.47385	0.74686	1	0	D-Ribulose 5-phosphate cpd:C00199	3-Methoxy-4-hydroxyphenylglycol glucuronide cpd:C03033; D-Ribulose 5-phosphate cpd:C00199; D-Xylulose cpd:C00310; L-Arabitol cpd:C00532; D-Xylitol cpd:C00379; Gulonic acid cpd:C00800; Glucose 1-phosphate cpd:C00103; Uridine diphosphate glucuronic acid cpd:C00167; Uridine diphosphate glucose cpd:C00029; D-Xylose cpd:C00181; D-Glucuronic acid cpd:C00191; Xylulose 5-phosphate cpd:C00231; L-Arabinose…
Pantothenate and CoA biosynthesis	0.47385	0.74686	1	0	L-Valine cpd:C00183	Dephospho-CoA cpd:C00882; Pantetheine 4'-phosphate cpd:C01134; Pantetheine cpd:C00831; 4-Phosphopantothenoylcysteine cpd:C04352; D-Pantothenoyl-L-cysteine cpd:C04079; D-4'-Phosphopantothenate cpd:C03492; L-Cysteine cpd:C00097; Pantothenic acid cpd:C00864; Ureidopropionic acid cpd:C02642; Dihydrouracil cpd:C00429; L-Valine cpd:C00183; Coenzyme A cpd:C00010; Beta-Alanine cpd:C00099; Uracil cpd:C001…
Tyrosine metabolism	0.53075	0.63346	1	0.17849	L-Tyrosine cpd:C00082; Tyramine cpd:C00483	L-Dopachrome cpd:C01693; Normetanephrine cpd:C05589; 3-Methoxy-4-hydroxyphenylglycolaldehyde cpd:C05583; Norepinephrine cpd:C00547; Epinephrine cpd:C00788; 3,4-Dihydroxymandelate cpd:C05580; 3,4-Dihydroxymandelaldehyde cpd:C05577; 3,4-Dihydroxyphenylglycol cpd:C05576; Metanephrine cpd:C05588; Dopamine cpd:C03758; 3,4-Dihydroxyphenylacetaldehyde cpd:C04043; 3,4-Dihydroxybenzeneacetic acid cpd:C011…
Propanoate metabolism	0.57591	0.5518	1	0	Propionic acid cpd:C00163	(S)-Methylmalonic acid semialdehyde cpd:C06002; Methylmalonyl-CoA cpd:C00683; Propionyl-CoA cpd:C00100; Propinol adenylate cpd:C05983; R-Methylmalonyl-CoA cpd:C01213; Succinic acid cpd:C00042; Hydroxypropionic acid cpd:C01013; Beta-Alanine cpd:C00099; 2-Propyn-1-al cpd:C05985; Acetyl-CoA cpd:C00024; Malonyl-CoA cpd:C00083; 2-Hydroxybutyric acid cpd:C05984; Acrylyl-CoA cpd:C00894; Propionic acid c…
Butanoate metabolism	0.57591	0.5518	1	0	L-Glutamic acid cpd:C00025	3-Butyn-1-al cpd:C06145; (R)-3-Hydroxybutyric acid cpd:C01089; Acetoacetic acid cpd:C00164; 3-Hydroxy-3-methylglutaryl-CoA cpd:C00356; Acetyl-CoA cpd:C00024; Acetoacetyl-CoA cpd:C00332; (S)-3-Hydroxybutanoyl-CoA cpd:C01144; Crotonoyl-CoA cpd:C00877; Gamma-Aminobutyric acid cpd:C00334; L-Glutamic acid cpd:C00025; Butanoyl-CoA cpd:C00136; Succinic acid semialdehyde cpd:C00232; Butyric acid cpd:C002…
Starch and sucrose metabolism	0.62753	0.46597	1	0.11158	Glucose 6-phosphate cpd:C00668	1,4-beta-D-Glucan cpd:C00760; Cellobiose cpd:C00185; beta-D-Fructose cpd:C02336; Sucrose cpd:C00089; D-Glucoside cpd:C01798; Uridine diphosphate glucuronic acid cpd:C00167; Uridine diphosphate glucose cpd:C00029; Glucose 1-phosphate cpd:C00103; 3-Methoxy-4-hydroxyphenylglycol glucuronide cpd:C03033; Glucose 6-phosphate cpd:C00668; Alpha-D-Glucose cpd:C00267; Starch cpd:C00369; Amylose cpd:C00718;…
Galactose metabolism	0.67296	0.39608	1	0.01949	Glucose 6-phosphate cpd:C00668	Stachyose cpd:C01613; D-Tagatose 6-phosphate cpd:C01097; D-Gal alpha 1->6D-Gal alpha 1->6D-Glucose cpd:C05404; Sucrose cpd:C00089; Raffinose cpd:C00492; Melibiose cpd:C05402; D-Galactose cpd:C00124; Galactosylglycerol cpd:C05401; Epimelibiose cpd:C05400; Melibiitol cpd:C05399; Galactinol cpd:C01235; Alpha-D-Glucose cpd:C00267; Alpha-Lactose cpd:C00243; Glucose 1-phosphate cpd:C00103; Uridine diph…
Glycolysis or Gluconeogenesis	0.67296	0.39608	1	0.03515	Glucose 6-phosphate cpd:C00668	Acetaldehyde cpd:C00084; Ethanol cpd:C00469; Pyruvic acid cpd:C00022; Thiamine pyrophosphate cpd:C00068; 2-(a-Hydroxyethyl)thiamine diphosphate cpd:C05125; Enzyme N6-(lipoyl)lysine cpd:C15972; Enzyme N6-(dihydrolipoyl)lysine cpd:C15973; Acetyl-CoA cpd:C00024; L-Lactic acid cpd:C00186; Phosphoenolpyruvic acid cpd:C00074; 2-Phospho-D-glyceric acid cpd:C00631; D-Glyceraldehyde 3-phosphate cpd:C00118…
Glutathione metabolism	0.67296	0.39608	1	0.05534	L-Glutamic acid cpd:C00025	R-S-Cysteinylglycine cpd:C05729; R-S-Glutathione cpd:C02320; Glutathione cpd:C00051; NADP cpd:C00006; NADPH cpd:C00005; Oxidized glutathione cpd:C00127; Gamma-Glutamylcysteine cpd:C00669; Glycine cpd:C00037; L-Cysteine cpd:C00097; L-Glutamic acid cpd:C00025; Cysteinylglycine cpd:C01419; Pyroglutamic acid cpd:C01879; L-Amino acid cpd:C00151; 5-L-Glutamyl-L-alanine cpd:C03740; RX cpd:C01322; Ornith…
Purine metabolism	0.78885	0.23718	1	0.00524	Xanthosine cpd:C01762; Adenine cpd:C00147	Guanosine diphosphate cpd:C00035; Xanthine cpd:C00385; D-Ribulose 5-phosphate cpd:C00117; Phosphoribosyl pyrophosphate cpd:C00119; L-Glutamine cpd:C00064; 5-Phosphoribosylamine cpd:C03090; Glycineamideribotide cpd:C03838; Phosphoribosylformylglycineamidine cpd:C04640; AICAR cpd:C04677; SAICAR cpd:C04823; 5-amino-1-(5-phospho-D-ribosyl)imidazole-4-carboxylate cpd:C04751; RNA cpd:C00046; Cyclic AMP…
Pyrimidine metabolism	0.79751	0.22626	1	0.01135	Cytidine cpd:C00475	Thioredoxin cpd:C00342; Uridine 5'-diphosphate cpd:C00015; Orotidylic acid cpd:C01103; RNA cpd:C00046; Uridine triphosphate cpd:C00075; Uridine 5'-monophosphate cpd:C00105; Uridine cpd:C00299; Dihydrouracil cpd:C00429; Ureidopropionic acid cpd:C02642; Cytidine triphosphate cpd:C00063; CDP cpd:C00112; Cytidine monophosphate cpd:C00055; Cytidine cpd:C00475; Thioredoxin disulfide cpd:C00343; dCDP cp…
Amino sugar and nucleotide sugar metabolism	0.79751	0.22626	1	0.08423	Glucose 6-phosphate cpd:C00668	N-Acetyl-D-glucosamine cpd:C00140; N-Acetyl-D-Glucosamine 6-Phosphate cpd:C00357; N-Acetyl-alpha-D-glucosamine 1-phosphate cpd:C04501; Uridine diphosphate-N-acetylglucosamine cpd:C00043; N-Acetylmannosamine cpd:C00645; N-Acetylneuraminic acid 9-phosphate cpd:C06241; N-Acetylneuraminic acid cpd:C00270; Galactose 1-phosphate cpd:C00446; Uridine diphosphate glucose cpd:C00029; Glucose 1-phosphate cp…
Valine, leucine and isoleucine degradation	0.80619	0.21544	1	0	L-Valine cpd:C00183	Enzyme N6-(lipoyl)lysine cpd:C15972; 2-Methyl-1-hydroxybutyl-ThPP cpd:C15978; Enzyme N6-(dihydrolipoyl)lysine cpd:C15973; 2-Methyl-1-hydroxypropyl-ThPP cpd:C15976; 3-Methyl-1-hydroxybutyl-ThPP cpd:C15974; Acetyl-CoA cpd:C00024; Acetoacetyl-CoA cpd:C00332; Acetoacetic acid cpd:C00164; 3-Hydroxy-3-methylglutaryl-CoA cpd:C00356; 3-Methylcrotonyl-CoA cpd:C03069; 3-Hydroxyisovaleryl-CoA cpd:C05998; Is…
Tryptophan metabolism	0.83007	0.18624	1	0.15063	Serotonin cpd:C00780	L-Tryptophan cpd:C00078; Melatonin cpd:C01598; N-Acetylserotonin cpd:C00978; Serotonin cpd:C00780; 5-Hydroxyindoleacetic acid cpd:C05635; 5-Hydroxykynurenamine cpd:C05638; 5-Hydroxykynurenine cpd:C05651; 5-Hydroxy-L-tryptophan cpd:C00643; L-Formylkynurenine cpd:C02700; Acetoacetyl-CoA cpd:C00332; (S)-3-Hydroxybutanoyl-CoA cpd:C01144; Crotonoyl-CoA cpd:C00877; Glutaryl-CoA cpd:C00527; Oxoadipic ac…
Primary bile acid biosynthesis	0.86362	0.14662	1	0.02976	Glycocholic acid cpd:C01921	Cholesterol cpd:C00187; Cholest-5-ene-3beta,26-diol cpd:C15610; 25-Hydroxycholesterol cpd:C15519; 7 alpha,26-Dihydroxy-4-cholesten-3-one cpd:C17336; 4-Cholesten-7alpha,12alpha-diol-3-one cpd:C17339; 7a-Hydroxy-cholestene-3-one cpd:C05455; 5-b-Cholestane-3a ,7a ,12a-triol cpd:C05454; (25R)-3alpha,7alpha,12alpha-Trihydroxy-5beta-cholestan-26-oyl-CoA cpd:C15613; (25S)-3alpha,7alpha,12alpha-Trihydrox…
Drug metabolism - cytochrome P450	0.91237	0.091712	1	0	3-Hydroxyvalproic acid cpd:C16651	N-Desmethyltamoxifen cpd:C16546; Tamoxifen cpd:C07108; Hydroxytamoxifen cpd:C05011; Lidocaine cpd:C07073; N-Acetyl-O-demethylpuromycin-5'-phosphate cpd:C07030; 4-Hydroxycyclophosphamide cpd:C07643; Ifosfamide cpd:C07047; Cyclophosphamide anhydrous cpd:C07888; Aldophosphamide cpd:C07645; Codeine cpd:C06174; Morphine cpd:C01516; Methadone cpd:C07163; Levomethadyl acetate cpd:C08012; Carbamazepine c…

## Sheet: D-PPs vs I-PPs
Pathway	P vaule	-ln(p)	FDR	Impact	Hits Cpd	Total Cpd
Phenylalanine metabolism	0.0037321	5.5908	0.3023	0.40741	L-Phenylalanine cpd:C00079; 2-Phenylacetamide cpd:C02505; L-Tyrosine cpd:C00082	Phenylacetaldehyde cpd:C00601; L-Phenylalanine cpd:C00079; Phenylethylamine cpd:C05332; Phenylpyruvic acid cpd:C00166; Phenylacetic acid cpd:C07086; Ortho-Hydroxyphenylacetic acid cpd:C05852; Enol-phenylpyruvate cpd:C02763; 2-Phenylacetamide cpd:C02505; L-Tyrosine cpd:C00082
Phenylalanine, tyrosine and tryptophan biosynthesis	0.0081394	4.811	0.32964	1	L-Phenylalanine cpd:C00079; L-Tyrosine cpd:C00082	Phenylpyruvic acid cpd:C00166; L-Phenylalanine cpd:C00079; L-Tyrosine cpd:C00082; 4-Hydroxyphenylpyruvic acid cpd:C01179
Histidine metabolism	0.014124	4.2599	0.38134	0.52518	L-Histidine cpd:C00135; Histamine cpd:C00388; Formiminoglutamic acid cpd:C00439	4-Imidazolone-5-propionic acid cpd:C03680; Urocanic acid cpd:C00785; L-Histidine cpd:C00135; Imidazole-4-acetaldehyde cpd:C05130; 1-Methylhistamine cpd:C05127; Methylimidazole acetaldehyde cpd:C05827; Histamine cpd:C00388; Carnosine cpd:C00386; N-Formyl-L-aspartate cpd:C01044; Formiminoglutamic acid cpd:C00439; Imidazoleacetic acid cpd:C02835; Methylimidazoleacetic acid cpd:C05828; L-Aspartic aci…
Nitrogen metabolism	0.043202	3.1419	0.792	0	L-Glutamic acid cpd:C00025; L-Histidine cpd:C00135	Ammonia cpd:C00014; Carbon dioxide cpd:C00011; L-Glutamic acid cpd:C00025; L-Glutamine cpd:C00064; L-Cystathionine cpd:C02291; L-Histidine cpd:C00135; Carbamoylphosphate cpd:C00169; Carbonic acid cpd:C01353; Glycine cpd:C00037
Amino sugar and nucleotide sugar metabolism	0.048889	3.0182	0.792	0.30825	N-Acetyl-D-glucosamine cpd:C00140; N-Acetyl-D-Glucosamine 6-Phosphate cpd:C00357; N-Glycolylneuraminic acid cpd:C03410; Glucose 6-phosphate cpd:C00668	N-Acetyl-D-glucosamine cpd:C00140; N-Acetyl-D-Glucosamine 6-Phosphate cpd:C00357; N-Acetyl-alpha-D-glucosamine 1-phosphate cpd:C04501; Uridine diphosphate-N-acetylglucosamine cpd:C00043; N-Acetylmannosamine cpd:C00645; N-Acetylneuraminic acid 9-phosphate cpd:C06241; N-Acetylneuraminic acid cpd:C00270; Galactose 1-phosphate cpd:C00446; Uridine diphosphate glucose cpd:C00029; Glucose 1-phosphate cp…
Arginine and proline metabolism	0.082708	2.4924	0.96212	0.19942	L-Glutamic acid cpd:C00025; L-Proline cpd:C00148; D-Proline cpd:C00763; Creatine cpd:C00300	L-Glutamine cpd:C00064; Ammonia cpd:C00014; Carbamoylphosphate cpd:C00169; Ornithine cpd:C00077; Citrulline cpd:C00327; L-Aspartic acid cpd:C00049; Argininosuccinic acid cpd:C03406; L-Arginine cpd:C00062; L-Glutamic acid cpd:C00025; N-Acetylornithine cpd:C00437; L-Proline cpd:C00148; Peptide cpd:C00012; D-Proline cpd:C00763; Hydroxyproline cpd:C01157; Pyrroline hydroxycarboxylic acid cpd:C04281; …
Aminoacyl-tRNA biosynthesis	0.092009	2.3859	0.96212	0.14035	L-Histidine cpd:C00135; L-Phenylalanine cpd:C00079; L-Serine cpd:C00065; L-Tyrosine cpd:C00082; L-Proline cpd:C00148	L-Asparagine cpd:C00152; tRNA(Asn) cpd:C01637; L-Histidine cpd:C00135; tRNA(His) cpd:C01643; L-Phenylalanine cpd:C00079; tRNA(Phe) cpd:C01648; L-Arginine cpd:C00062; tRNA(Arg) cpd:C01636; L-Glutamine cpd:C00064; tRNA(Gln) cpd:C01640; L-Cysteine cpd:C00097; tRNA(Cys) cpd:C01639; Glycine cpd:C00037; tRNA(Gly) cpd:C01642; tRNA(Asp) cpd:C01638; L-Aspartic acid cpd:C00049; L-Serine cpd:C00065; tRNA(Se…
Glycerophospholipid metabolism	0.095024	2.3536	0.96212	0.07224	Phosphorylcholine cpd:C00588; Choline cpd:C00114; O-Phosphoethanolamine cpd:C00346	Phosphatidylethanolamine cpd:C00350; Phosphatidylcholine cpd:C00157; Dihydroxyacetone phosphate cpd:C00111; LysoPC(18:1(9Z)) cpd:C04230; 1,2-Diacyl-sn-glycerol cpd:C00641; Citicoline cpd:C00307; Phosphorylcholine cpd:C00588; Choline cpd:C00114; Acetylcholine cpd:C01996; O-Phosphoethanolamine cpd:C00346; Ethanolamine cpd:C00189; PA(16:0/16:0) cpd:C00416; Acyl-CoA cpd:C00040; 1-Acyl-sn-glycerol 3-p…
Ubiquinone and other terpenoid-quinone biosynthesis	0.11008	2.2065	0.96561	0	L-Tyrosine cpd:C00082	4-Hydroxyphenylpyruvic acid cpd:C01179; L-Tyrosine cpd:C00082; Homogentisic acid cpd:C00544
Glycine, serine and threonine metabolism	0.11921	2.1269	0.96561	0.2428	L-Serine cpd:C00065; Choline cpd:C00114; Creatine cpd:C00300	L-Serine cpd:C00065; Choline cpd:C00114; Glyceric acid cpd:C00258; Betaine cpd:C00719; Guanidoacetic acid cpd:C00581; 3-Phospho-D-glycerate cpd:C00197; Dimethylglycine cpd:C01026; L-Cystathionine cpd:C02291; Glycine cpd:C00037; Phosphoserine cpd:C01005; Sarcosine cpd:C00213; 5,10-Methylene-THF cpd:C00143; L-Threonine cpd:C00188; Lipoylprotein cpd:C02051; Aminoacetone cpd:C01888; Tetrahydrofolic a…
Pentose phosphate pathway	0.16143	1.8237	1	0.17117	Glucose 6-phosphate cpd:C00668; D-Ribulose 5-phosphate cpd:C00199	Glucose 6-phosphate cpd:C00668; Deoxyribose cpd:C01801; Deoxyribose 5-phosphate cpd:C00673; D-Ribulose 5-phosphate cpd:C00117; D-Ribose cpd:C00121; Sedoheptulose 7-phosphate cpd:C05382; D-Glyceraldehyde 3-phosphate cpd:C00118; D-Ribulose 5-phosphate cpd:C00199; Beta-D-Fructose 6-phosphate cpd:C05345; beta-D-Fructose 1,6-bisphosphate cpd:C05378; 6-Phosphogluconic acid cpd:C00345; 6-Phosphonoglucon…
D-Glutamine and D-glutamate metabolism	0.17677	1.7329	1	1	L-Glutamic acid cpd:C00025	L-Glutamic acid cpd:C00025; D-Glutamine cpd:C00819; L-Glutamine cpd:C00064; Oxoglutaric acid cpd:C00026; D-Glutamic acid cpd:C00217
Sphingolipid metabolism	0.18912	1.6654	1	0.01504	L-Serine cpd:C00065; O-Phosphoethanolamine cpd:C00346	Sphinganine cpd:C00836; Sphinganine 1-phosphate cpd:C01120; Dihydroceramide cpd:C12126; Phytoceramide cpd:C12145; SM cpd:C00550; Ceramide 1-phosphate cpd:C02960; Sphingosine 1-phosphate cpd:C06124; Palmityl-CoA cpd:C00154; L-Serine cpd:C00065; 3-Dehydrosphinganine cpd:C02934; Galabiosylceramide cpd:C06126; Galactosylceramide cpd:C02686; GM4 cpd:C06128; Ceramide cpd:C00195; Lactosylceramide cpd:C0…
Cyanoamino acid metabolism	0.20825	1.569	1	0	L-Serine cpd:C00065	3-Cyano-L-alanine cpd:C02512; Beta-Aminopropionitrile cpd:C05670; Glycine cpd:C00037; gamma-Glutamyl-beta-cyanoalanine cpd:C05711; gamma-Glutamyl-beta-aminopropiononitrile cpd:C06114; L-Serine cpd:C00065
Glutathione metabolism	0.26051	1.3451	1	0.06965	L-Glutamic acid cpd:C00025; Pyroglutamic acid cpd:C01879	R-S-Cysteinylglycine cpd:C05729; R-S-Glutathione cpd:C02320; Glutathione cpd:C00051; NADP cpd:C00006; NADPH cpd:C00005; Oxidized glutathione cpd:C00127; Gamma-Glutamylcysteine cpd:C00669; Glycine cpd:C00037; L-Cysteine cpd:C00097; L-Glutamic acid cpd:C00025; Cysteinylglycine cpd:C01419; Pyroglutamic acid cpd:C01879; L-Amino acid cpd:C00151; 5-L-Glutamyl-L-alanine cpd:C03740; RX cpd:C01322; Ornith…
Methane metabolism	0.29577	1.2182	1	0.4	L-Serine cpd:C00065	S-Formylglutathione cpd:C01031; Glycine cpd:C00037; 5,10-Methylene-THF cpd:C00143; S-(Hydroxymethyl)glutathione cpd:C14180; Methanol cpd:C00132; Formic acid cpd:C00058; L-Serine cpd:C00065; Formaldehyde cpd:C00067; 5-Methyltetrahydrofolic acid cpd:C00440
Pyrimidine metabolism	0.41603	0.877	1	0.10276	Cytidine cpd:C00475; Uracil cpd:C00106	Thioredoxin cpd:C00342; Uridine 5'-diphosphate cpd:C00015; Orotidylic acid cpd:C01103; RNA cpd:C00046; Uridine triphosphate cpd:C00075; Uridine 5'-monophosphate cpd:C00105; Uridine cpd:C00299; Dihydrouracil cpd:C00429; Ureidopropionic acid cpd:C02642; Cytidine triphosphate cpd:C00063; CDP cpd:C00112; Cytidine monophosphate cpd:C00055; Cytidine cpd:C00475; Thioredoxin disulfide cpd:C00343; dCDP cp…
Pentose and glucuronate interconversions	0.44329	0.81352	1	0	D-Ribulose 5-phosphate cpd:C00199	3-Methoxy-4-hydroxyphenylglycol glucuronide cpd:C03033; D-Ribulose 5-phosphate cpd:C00199; D-Xylulose cpd:C00310; L-Arabitol cpd:C00532; D-Xylitol cpd:C00379; Gulonic acid cpd:C00800; Glucose 1-phosphate cpd:C00103; Uridine diphosphate glucuronic acid cpd:C00167; Uridine diphosphate glucose cpd:C00029; D-Xylose cpd:C00181; D-Glucuronic acid cpd:C00191; Xylulose 5-phosphate cpd:C00231; L-Arabinose…
Pantothenate and CoA biosynthesis	0.44329	0.81352	1	0	Uracil cpd:C00106	Dephospho-CoA cpd:C00882; Pantetheine 4'-phosphate cpd:C01134; Pantetheine cpd:C00831; 4-Phosphopantothenoylcysteine cpd:C04352; D-Pantothenoyl-L-cysteine cpd:C04079; D-4'-Phosphopantothenate cpd:C03492; L-Cysteine cpd:C00097; Pantothenic acid cpd:C00864; Ureidopropionic acid cpd:C02642; Dihydrouracil cpd:C00429; L-Valine cpd:C00183; Coenzyme A cpd:C00010; Beta-Alanine cpd:C00099; Uracil cpd:C001…
Tryptophan metabolism	0.46897	0.75722	1	0.15732	Serotonin cpd:C00780; 3-Hydroxyanthranilic acid cpd:C00632	L-Tryptophan cpd:C00078; Melatonin cpd:C01598; N-Acetylserotonin cpd:C00978; Serotonin cpd:C00780; 5-Hydroxyindoleacetic acid cpd:C05635; 5-Hydroxykynurenamine cpd:C05638; 5-Hydroxykynurenine cpd:C05651; 5-Hydroxy-L-tryptophan cpd:C00643; L-Formylkynurenine cpd:C02700; Acetoacetyl-CoA cpd:C00332; (S)-3-Hydroxybutanoyl-CoA cpd:C01144; Crotonoyl-CoA cpd:C00877; Glutaryl-CoA cpd:C00527; Oxoadipic ac…
Tyrosine metabolism	0.48177	0.73028	1	0.17849	L-Tyrosine cpd:C00082; Tyramine cpd:C00483	L-Dopachrome cpd:C01693; Normetanephrine cpd:C05589; 3-Methoxy-4-hydroxyphenylglycolaldehyde cpd:C05583; Norepinephrine cpd:C00547; Epinephrine cpd:C00788; 3,4-Dihydroxymandelate cpd:C05580; 3,4-Dihydroxymandelaldehyde cpd:C05577; 3,4-Dihydroxyphenylglycol cpd:C05576; Metanephrine cpd:C05588; Dopamine cpd:C03758; 3,4-Dihydroxyphenylacetaldehyde cpd:C04043; 3,4-Dihydroxybenzeneacetic acid cpd:C011…
beta-Alanine metabolism	0.48537	0.72285	1	0	Uracil cpd:C00106	Acrylyl-CoA cpd:C00894; 3-Hydroxypropionyl-CoA cpd:C05668; Hydroxypropionic acid cpd:C01013; Malonyl-CoA cpd:C00083; Beta-Alanine cpd:C00099; L-Aspartic acid cpd:C00049; Spermine cpd:C00750; 1,3-Diaminopropane cpd:C00986; 3-Aminopropionaldehyde cpd:C05665; Ureidopropionic acid cpd:C02642; Dihydrouracil cpd:C00429; Anserine cpd:C01262; Propionyl-CoA cpd:C00100; Acetyl-CoA cpd:C00024; Malonic semia…
Butanoate metabolism	0.54269	0.61121	1	0	L-Glutamic acid cpd:C00025	3-Butyn-1-al cpd:C06145; (R)-3-Hydroxybutyric acid cpd:C01089; Acetoacetic acid cpd:C00164; 3-Hydroxy-3-methylglutaryl-CoA cpd:C00356; Acetyl-CoA cpd:C00024; Acetoacetyl-CoA cpd:C00332; (S)-3-Hydroxybutanoyl-CoA cpd:C01144; Crotonoyl-CoA cpd:C00877; Gamma-Aminobutyric acid cpd:C00334; L-Glutamic acid cpd:C00025; Butanoyl-CoA cpd:C00136; Succinic acid semialdehyde cpd:C00232; Butyric acid cpd:C002…
Starch and sucrose metabolism	0.59374	0.52131	1	0.11158	Glucose 6-phosphate cpd:C00668	1,4-beta-D-Glucan cpd:C00760; Cellobiose cpd:C00185; beta-D-Fructose cpd:C02336; Sucrose cpd:C00089; D-Glucoside cpd:C01798; Uridine diphosphate glucuronic acid cpd:C00167; Uridine diphosphate glucose cpd:C00029; Glucose 1-phosphate cpd:C00103; 3-Methoxy-4-hydroxyphenylglycol glucuronide cpd:C03033; Glucose 6-phosphate cpd:C00668; Alpha-D-Glucose cpd:C00267; Starch cpd:C00369; Amylose cpd:C00718;…
Alanine, aspartate and glutamate metabolism	0.59374	0.52131	1	0.27333	L-Glutamic acid cpd:C00025	N-Acetyl-L-aspartic acid cpd:C01042; 2-Oxosuccinamate cpd:C02362; L-Aspartic acid cpd:C00049; D-Aspartic acid cpd:C00402; Argininosuccinic acid cpd:C03406; Adenylsuccinic acid cpd:C03794; L-Alanine cpd:C00041; Succinic acid semialdehyde cpd:C00232; L-Glutamic acid cpd:C00025; Gamma-Aminobutyric acid cpd:C00334; L-Glutamine cpd:C00064; Ammonia cpd:C00014; 2-Keto-glutaramic acid cpd:C00940; (S)-1-P…
Galactose metabolism	0.63919	0.44756	1	0.01949	Glucose 6-phosphate cpd:C00668	Stachyose cpd:C01613; D-Tagatose 6-phosphate cpd:C01097; D-Gal alpha 1->6D-Gal alpha 1->6D-Glucose cpd:C05404; Sucrose cpd:C00089; Raffinose cpd:C00492; Melibiose cpd:C05402; D-Galactose cpd:C00124; Galactosylglycerol cpd:C05401; Epimelibiose cpd:C05400; Melibiitol cpd:C05399; Galactinol cpd:C01235; Alpha-D-Glucose cpd:C00267; Alpha-Lactose cpd:C00243; Glucose 1-phosphate cpd:C00103; Uridine diph…
Glycolysis or Gluconeogenesis	0.63919	0.44756	1	0.03515	Glucose 6-phosphate cpd:C00668	Acetaldehyde cpd:C00084; Ethanol cpd:C00469; Pyruvic acid cpd:C00022; Thiamine pyrophosphate cpd:C00068; 2-(a-Hydroxyethyl)thiamine diphosphate cpd:C05125; Enzyme N6-(lipoyl)lysine cpd:C15972; Enzyme N6-(dihydrolipoyl)lysine cpd:C15973; Acetyl-CoA cpd:C00024; L-Lactic acid cpd:C00186; Phosphoenolpyruvic acid cpd:C00074; 2-Phospho-D-glyceric acid cpd:C00631; D-Glyceraldehyde 3-phosphate cpd:C00118…
Cysteine and methionine metabolism	0.66667	0.40546	1	0.02313	L-Serine cpd:C00065	2-Oxo-4-methylthiobutanoic acid cpd:C01180; 1,2-Dihydroxy-3-keto-5-methylthiopentene cpd:C15606; 5-Methylthioribulose 1-phosphate cpd:C04582; 5'-Methylthioadenosine cpd:C00170; S-Adenosylmethioninamine cpd:C01137; S-Adenosylmethionine cpd:C00019; L-Cystathionine cpd:C02291; L-Homocysteine cpd:C00155; L-Serine cpd:C00065; L-Methionine cpd:C00073; S-Adenosylhomocysteine cpd:C00021; 2,3-Diketo-5-met…
Purine metabolism	0.74446	0.2951	1	0.00524	Xanthosine cpd:C01762; Adenine cpd:C00147	Guanosine diphosphate cpd:C00035; Xanthine cpd:C00385; D-Ribulose 5-phosphate cpd:C00117; Phosphoribosyl pyrophosphate cpd:C00119; L-Glutamine cpd:C00064; 5-Phosphoribosylamine cpd:C03090; Glycineamideribotide cpd:C03838; Phosphoribosylformylglycineamidine cpd:C04640; AICAR cpd:C04677; SAICAR cpd:C04823; 5-amino-1-(5-phospho-D-ribosyl)imidazole-4-carboxylate cpd:C04751; RNA cpd:C00046; Cyclic AMP…
Primary bile acid biosynthesis	0.8375	0.17733	1	0.02976	Glycocholic acid cpd:C01921	Cholesterol cpd:C00187; Cholest-5-ene-3beta,26-diol cpd:C15610; 25-Hydroxycholesterol cpd:C15519; 7 alpha,26-Dihydroxy-4-cholesten-3-one cpd:C17336; 4-Cholesten-7alpha,12alpha-diol-3-one cpd:C17339; 7a-Hydroxy-cholestene-3-one cpd:C05455; 5-b-Cholestane-3a ,7a ,12a-triol cpd:C05454; (25R)-3alpha,7alpha,12alpha-Trihydroxy-5beta-cholestan-26-oyl-CoA cpd:C15613; (25S)-3alpha,7alpha,12alpha-Trihydrox…
Drug metabolism - cytochrome P450	0.89145	0.11491	1	0	3-Hydroxyvalproic acid cpd:C16651	N-Desmethyltamoxifen cpd:C16546; Tamoxifen cpd:C07108; Hydroxytamoxifen cpd:C05011; Lidocaine cpd:C07073; N-Acetyl-O-demethylpuromycin-5'-phosphate cpd:C07030; 4-Hydroxycyclophosphamide cpd:C07643; Ifosfamide cpd:C07047; Cyclophosphamide anhydrous cpd:C07888; Aldophosphamide cpd:C07645; Codeine cpd:C06174; Morphine cpd:C01516; Methadone cpd:C07163; Levomethadyl acetate cpd:C08012; Carbamazepine c…

## Sheet: J-PPs vs I-PPs
Pathway	Raw p	-ln(p)	FDR	Impact	Hits Cpd	Total Cpd
Glycine, serine and threonine metabolism	0.067487	2.6958	1	0	D-Serine cpd:C00740	L-Serine cpd:C00065; Choline cpd:C00114; Glyceric acid cpd:C00258; Betaine cpd:C00719; Guanidoacetic acid cpd:C00581; 3-Phospho-D-glycerate cpd:C00197; Dimethylglycine cpd:C01026; L-Cystathionine cpd:C02291; Glycine cpd:C00037; Phosphoserine cpd:C01005; Sarcosine cpd:C00213; 5,10-Methylene-THF cpd:C00143; L-Threonine cpd:C00188; Lipoylprotein cpd:C02051; Aminoacetone cpd:C01888; Tetrahydrofolic a…
